# Supplementary material
Source: Springer Nature journal article supplement (https://www.springermedizin.de/resource/supplementary/12947_2004_33_MOESM6_ESM.pdf/9556040)

**a** CD25 expression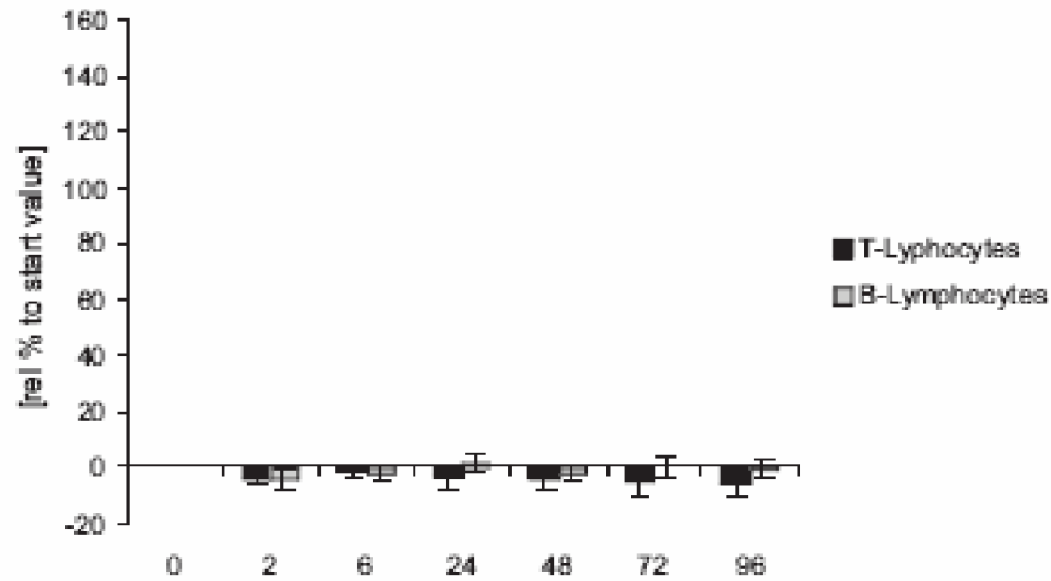**b** CD71 expression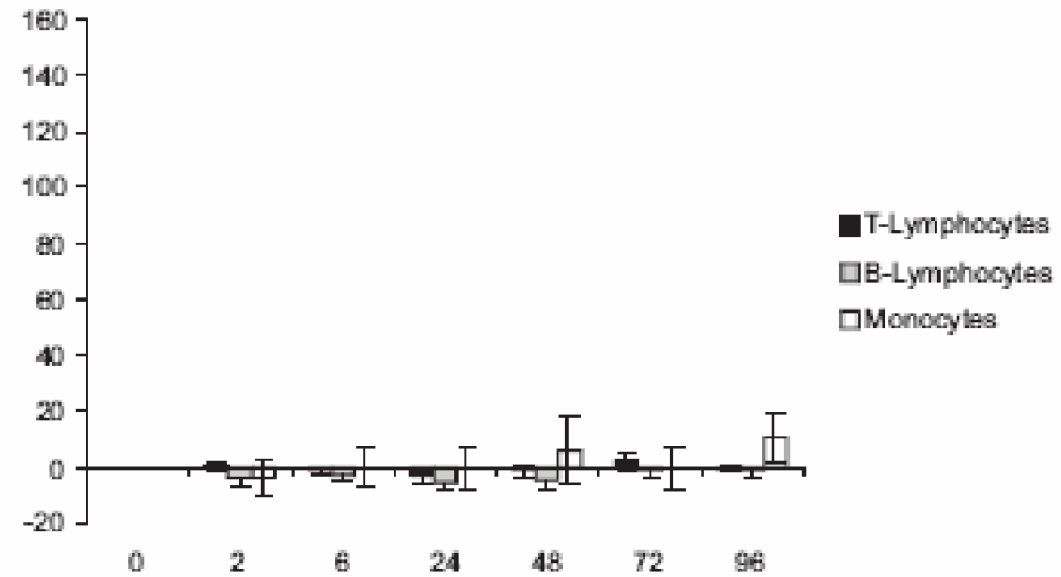**c** CD69 expression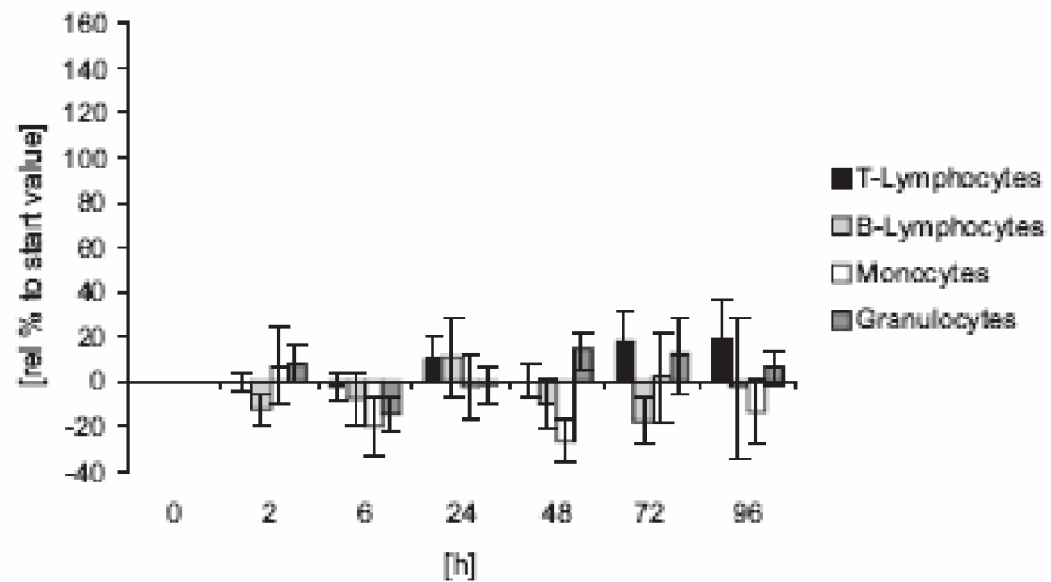**d** CD11b expression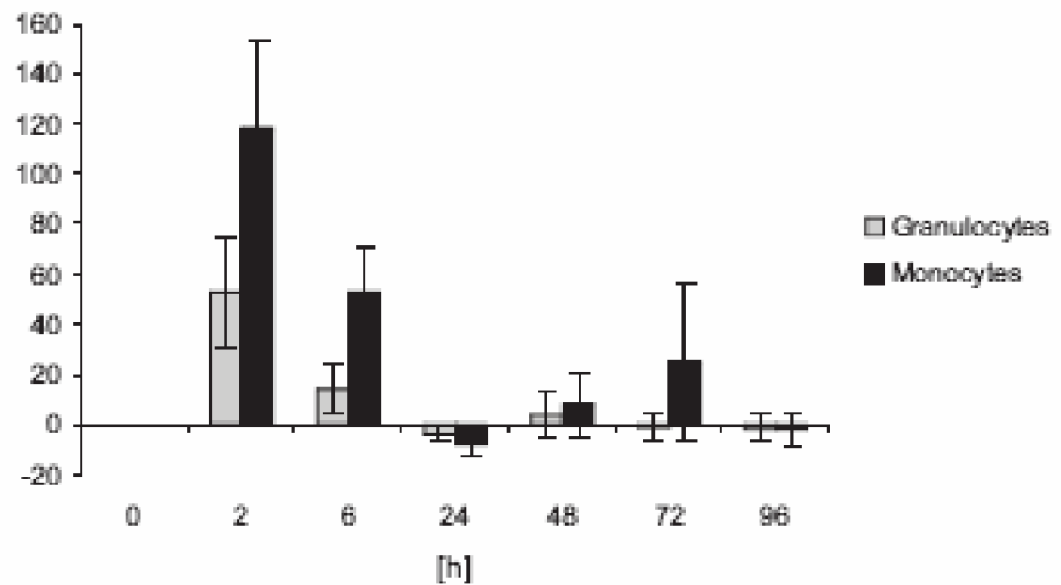

Supplement: MOESM6 [file 9556040]
